# Supplementary material for: Effect of dust on rainfall over the Red Sea coast based on WRF-Chem model simulations
Source: Copernicus journal article supplement (doi:10.5194/acp-22-8659-2022), 2022-07-06
Supplement: Supplementary file 1 [file acp-22-8659-2022-supplement.pdf]

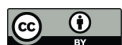

*Supplement of*

## **Effect of dust on rainfall over the Red Sea coast based on WRF-Chem model simulations**

**Sagar P. Parajuli et al.**

*Correspondence to:* Sagar P. Parajuli (sagar.parajuli@kaust.edu.sa)

The copyright of individual parts of the supplement might differ from the article licence.

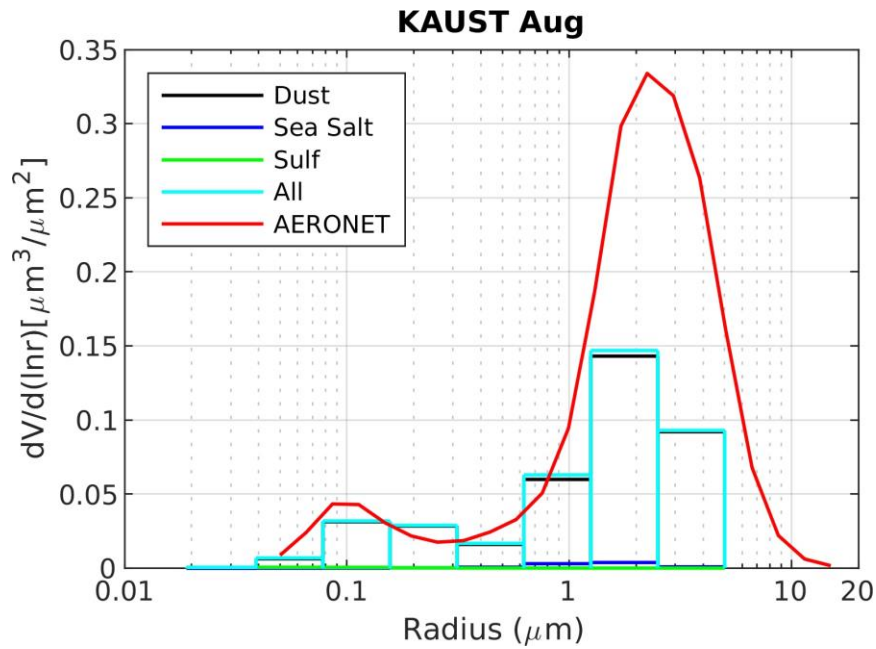

Figure S1. Model-simulated (WRF-Chem) aerosol volume size distribution as compared to AERONET data. Data averaged over the period of August 1-22, 2015 at KAUST.

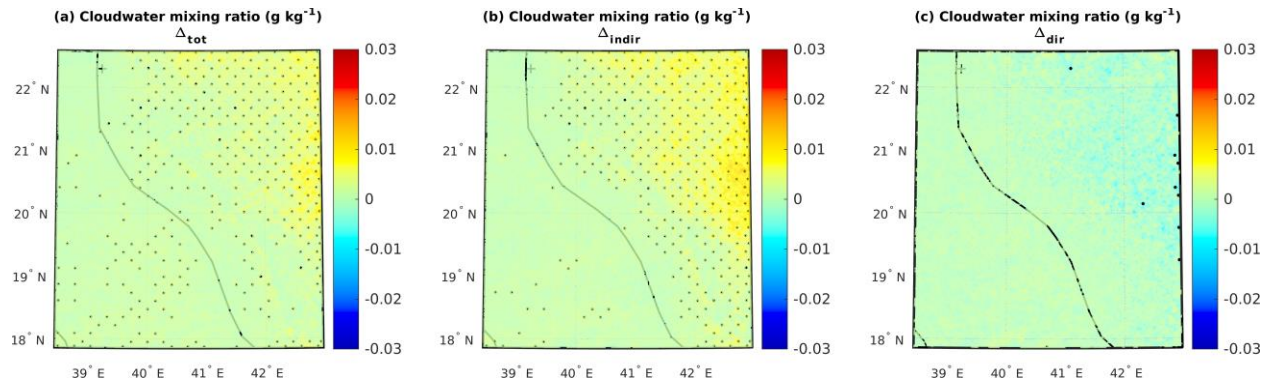

Figure S2. Spatial pattern of cloudwater mixing ratio at a cloud-level height (~570 hPa, ~4.6 km) in terms of total, indirect, and direct effects averaged for August 4-31 (2006-2015). Areas where the change is statistically significant at 5% significance level are marked by black dots.

Table S1. Dust emission size fractions\* used in WRF-Chem.

| Size bins,<br>radius ( $\mu\text{m}$ ) | Default<br>fractions | Modified<br>fractions |
|----------------------------------------|----------------------|-----------------------|
| 0.1-1.0                                | 0.1074               | 0.20                  |
| 1.0-1.8                                | 0.1012               | 0.19                  |
| 1.8-3.0                                | 0.2078               | 0.32                  |
| 3.0-6.0                                | 0.4817               | 0.19                  |
| 6.0-10.0                               | 0.1019               | 0.10                  |

\*subroutine phys/module\_data\_gocart\_dust.F

Table S2. MOSAIC dust size fractions used in WRF-Chem.

| Size bins,<br>radius ( $\mu\text{m}$ ) | Default<br>Fractions | Modified<br>fractions |
|----------------------------------------|----------------------|-----------------------|
| 0.019-0.039                            | 1.00E-08             | 1.00E-08              |
| 0.039-0.078                            | 1.00E-06             | 0.01                  |
| 0.078-0.156                            | 3.00E-04             | 0.022                 |
| 0.156-0.312                            | 3.50E-03             | 0.01                  |
| 0.312-0.625                            | 0.018                | 0.008                 |
| 0.625-1.250                            | 0.070                | 0.04                  |
| 1.250-2.500                            | 0.259                | 0.21                  |
| 2.500-5.000                            | 0.420                | 0.42                  |

\*Subroutine chem/module\_mosaic\_addemiss.F
